# Supplementary material for: 1H-NMR metabolite profiles of different strains of Plasmodium falciparum
Source: PubMed Central journal article supplement (PMC4240024; doi:10.1042/bsr20140134), 2014-11-21

**Figure S1. Aspartate signals from representative  $^1\text{H}$  NMR spectra.** The four high field aspartate signals from experiments performed with uninfected RBCs, co-cultured RBCs, and RBCs infected with each of the non-transfectant *P. falciparum* strains are shown. Aspartate was among the metabolites with the lowest intensity signals in the  $^1\text{H}$  NMR spectra; the signal-to-noise ratios for this compound were typically  $> 6$ .

uRBC

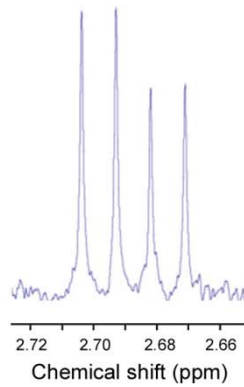

cRBC

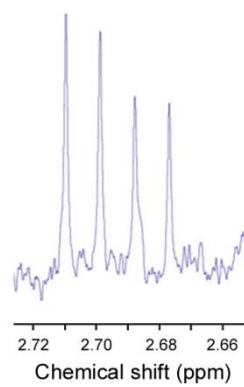

7G8-iRBC

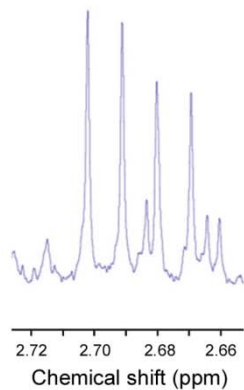

D10-iRBC

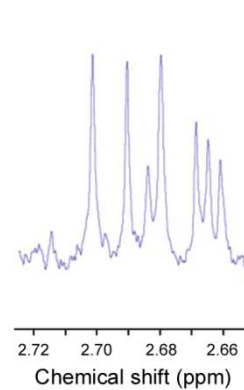

K1-iRBC

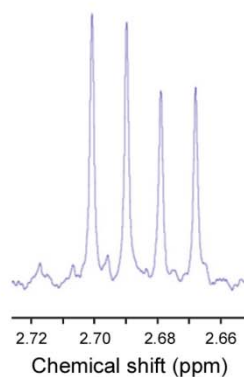

3D7-iRBC

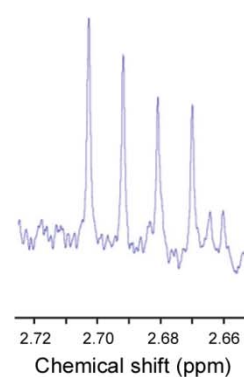

Supplement: bsr034e150ntsadd.pdf [file bsr034e150ntsadd.pdf]
